# Supplementary material for: Mitochondrial-Targeted Antioxidant Maintains Blood Flow, Mitochondrial Function, and Redox Balance in Old Mice Following Prolonged Limb Ischemia
Source: MDPI journal article supplement (doi:10.3390/ijms18091897), 2017-09-04
Supplement: s1 [file s1]

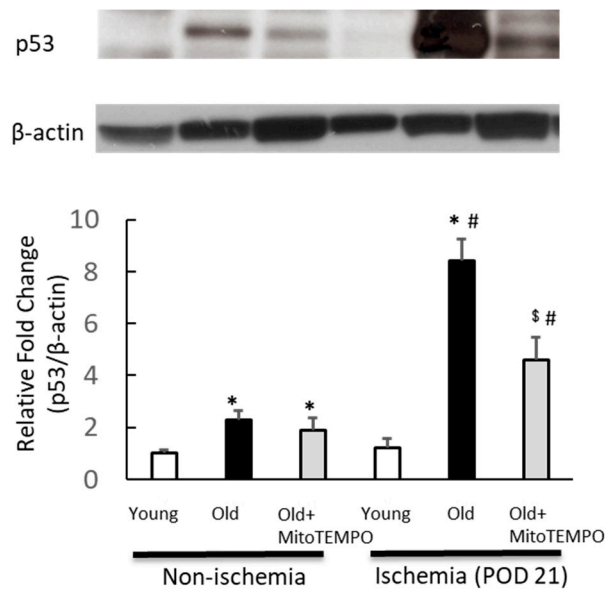

**Figure S1.** The expression of p53 was analyzed by western blotting in non-ischemic and ischemic (POD 21) skeletal muscle from young, old and MitoTEMPO-treated old mice. The p53 expression was higher in old mice compared to young mice for non-ischemic and ischemic (POD 21) skeletal muscles. MitoTEMPO treatment attenuated the elevation of p53 after induction of ischemia. The values are expressed as the means±S.E.M. n=6, each. \*P<0.05 vs. young mice, \$P<0.05 vs. old mice, #P<0.05 vs. non-ischemic skeletal muscle.

**Table S1.** Body weight of mice and weight of hind limb, gastrocnemius and soleus muscles. The ratio of ischemic hind limb (POD 21) to non-ischemic hind limb and the ratio of ischemic gastrocnemius and soleus muscles (POD 21) to non-ischemic gastrocnemius and soleus muscles were lower in old mice than young and MitoTEMPO-treated old mice. The values are expressed as the means±S.E.M. n=10, each. \*P<0.05 vs. young mice, \$P<0.05 vs. old mice.

|                                  |                       | Young mice | Old mice    | MitoTEMPO-treated old mice |
|----------------------------------|-----------------------|------------|-------------|----------------------------|
| B.W. (g)                         |                       | 19.6±0.2   | 28.2±0.2*   | 28.7±0.3*                  |
| hind limb (mg)                   | ischemia              | 955.0±21.4 | 887.8±33.5  | 1047.2±31.0                |
|                                  | Non-ischemia          | 1096.3±9.9 | 1230.5±23.7 | 1264.4±47.5                |
|                                  | Ischemia/non-ischemia | 0.87±0.01  | 0.72±0.02*  | 0.83±0.02 \$               |
| Gastrocnemius-soleus muscle (mg) | ischemia              | 62.7±5.6   | 69.4±2.8    | 87.5±8.6                   |
|                                  | Non-ischemia          | 75.4±4.0   | 118.3±2.0   | 115.1±5.4                  |
|                                  | Ischemia/non-ischemia | 0.82±0.03  | 0.58±0.02*  | 0.75±0.04 \$               |
